# Supplementary material for: p16INK4a Translation Suppressed by miR-24
Source: PLOS journal article supplement (doi:10.1371/journal.pone.0001864), 2008-03-25
Supplement: S2 (10.1371/journal.pone.0001864.s002) [file journal.pone.0001864.s002]

| miRNA        | Fold |
|--------------|------|
| hsa-miR-146b | 8.8  |
| hsa-miR-492  | 3.9  |
| hsa-miR-584  | 3.7  |
| hsa-miR-663  | 2.4  |
| hsa-miR-638  | 2.2  |
| hsa-miR-602  | 2.2  |
| hsa-miR-210  | 2.1  |
| hsa-miR-572  | 2.1  |
| hsa-miR-498  | 2.0  |

**Supplemental Figure S2. miRNAs showing increased expression levels in senescent cells.** Three independent preparations of total RNA from early-passage (Young, pdl 25) and from late-passage (Senescent, pdl 54) WI-38 cells were subjected to microarray analysis (Exiqon, Materials and Methods). Nine miRNAs showing increased levels are listed.
