# Supplementary material for: p16INK4a Translation Suppressed by miR-24
Source: PLOS journal article supplement (doi:10.1371/journal.pone.0001864), 2008-03-25
Supplement: S3 (10.1371/journal.pone.0001864.s003) [file journal.pone.0001864.s003]

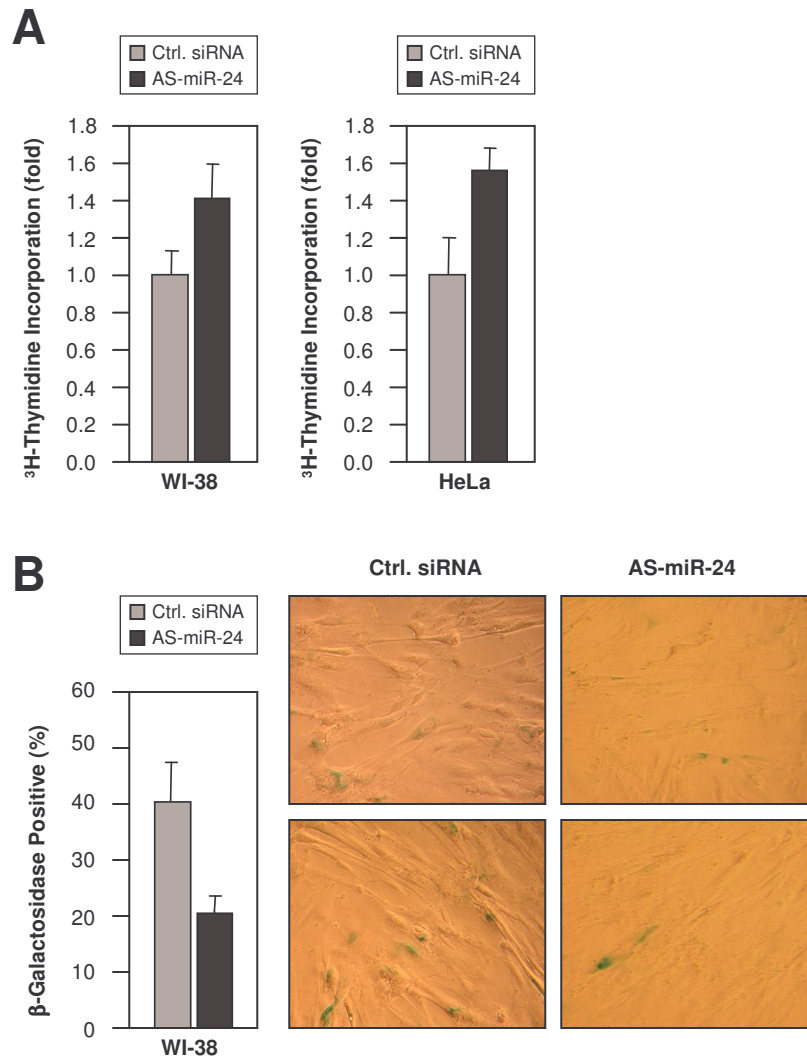

**Supplemental Figure S3. Analysis of  $^3\text{H}$ -Thymidine incorporation and senescence-associated  $\beta$ -galactosidase activity after reducing miR-24 levels. (A)** HeLa and pre-senescent WI-38 (Pdl 48) cells were transfected with AS-miR-24 (100 nM) and 48 hr later they were incubated with 2  $\mu\text{Ci}$   $^3\text{H}$ -Thymidine for 16 hr, whereupon  $^3\text{H}$ -Thymidine incorporation was measured in all transfection groups using standard procedures. Data were calculated as  $^3\text{H}$ -Thymidine incorporation in AS-miR-24-transfected cells relative to that in Ctrl. siRNA, and shown as fold change. Data are the means  $\pm$ SD from 3 independent experiments. HeLa cells are deficient in Rb function, and therefore the increase in p16 was not anticipated to inhibit proliferation (as measured here by  $^3\text{H}$ -Thymidine incorporation). **(B)** WI-38 cells (Pdl 48) were transfected with either Ctrl. siRNA or AS-miR-24 (100 nM) every 4 days; two weeks later, the levels of senescence-associated  $\beta$ -galactosidase activity was assessed by using a kit from Cell Signaling. The number of  $\beta$ -galactosidase-positive cells was quantified from 3 different experiments (means  $\pm$ SEM are plotted); two representative fields from each transfection group are shown.
