# Supplementary material for: p16INK4a Translation Suppressed by miR-24
Source: PLOS journal article supplement (doi:10.1371/journal.pone.0001864), 2008-03-25
Supplement: S4 (10.1371/journal.pone.0001864.s004) [file journal.pone.0001864.s004]

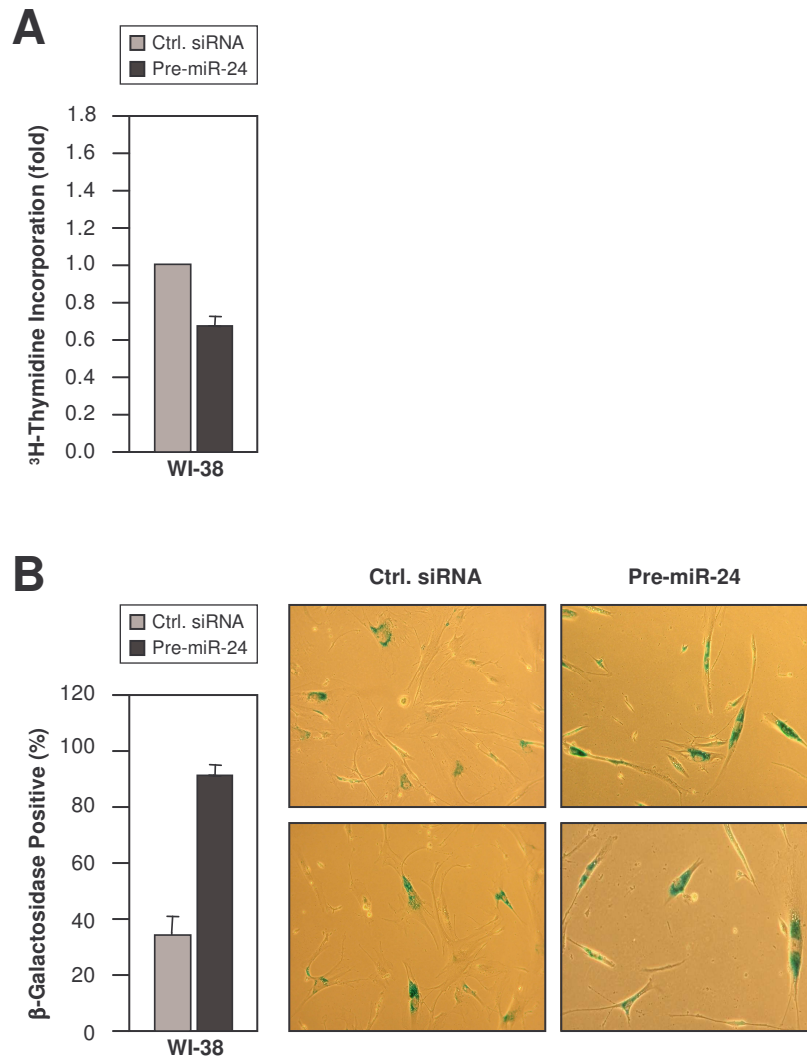

**Supplemental Figure S4. Analysis of <sup>3</sup>H-Thymidine incorporation and senescence-associated β-galactosidase activity after increasing miR-24 levels in WI-38 cells. (A)** Pre-senescent WI-38 (Pdl 48) cells were transfected with Pre-miR-24 (100 nM) and 48 hr later they were incubated with 2 μCi <sup>3</sup>H-Thymidine for 16 hr, whereupon <sup>3</sup>H-Thymidine incorporation was measured in both transfection groups using standard procedures. Data were calculated as <sup>3</sup>H-Thymidine incorporation in Pre-miR-24-transfected cells relative to that in Ctrl. siRNA and shown as fold change. Data are the means + SD from 3 independent experiments. **(B)** WI-38 cells (Pdl 48) were transfected with either Ctrl. siRNA or Pre-miR-24 (100 nM) every 4 days; two weeks later, the levels of a senescence-associated β-galactosidase activity was assessed by using a kit from Cell Signaling. The number of β-galactosidase-positive cells was quantified from 3 different experiments (means +SEM are plotted); two representative fields from each transfection group are shown.
