# Supplementary material for: p16INK4a Translation Suppressed by miR-24
Source: PLOS journal article supplement (doi:10.1371/journal.pone.0001864), 2008-03-25
Supplement: S5 (10.1371/journal.pone.0001864.s005) [file journal.pone.0001864.s005]

**A**

|      | Miranda     | RNA22     |
|------|-------------|-----------|
| CDK6 | 2918-2941   | 1704-1725 |
| CDK6 | 3643-3664   | 2920-2941 |
| CDK6 | 10877-10894 | 2639-2660 |
| CDK6 |             | 3571-3592 |
| CDK6 |             | 6371-6392 |

**B**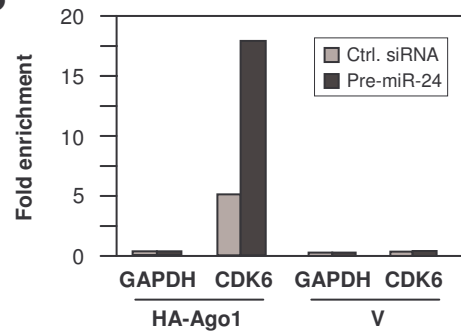**C**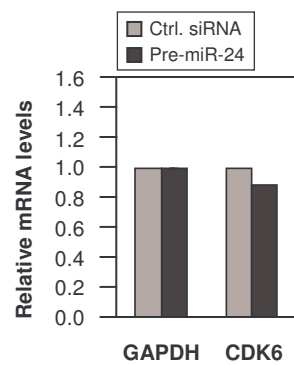**D**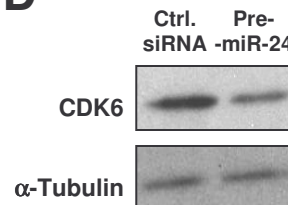

**Supplemental Figure S5. CDK6 is a functional target of miR-24.** (A) CDK6 mRNA showing predicted miR-24 binding sites (5 using RNA22, 3 using Miranda). (B) Forty-eight hr after transfection of HeLa cells with plasmid (V or HA-Ago1) and either control (siRNA) or pre-miR-24 RNA, RT-qPCR analysis was used to test the association of CDK6 mRNA with the RISC complex in the V and HA-Ago1 groups in the IP reactions. (C) CDK6 and GAPDH mRNA levels in the transfection groups were unchanged. (D) Western blot analysis of CDK6 expression after increasing miR-24 levels.
