# Supplementary material for: p16INK4a Translation Suppressed by miR-24
Source: PLOS journal article supplement (doi:10.1371/journal.pone.0001864), 2008-03-25
Supplement: S6 (10.1371/journal.pone.0001864.s006) [file journal.pone.0001864.s006]

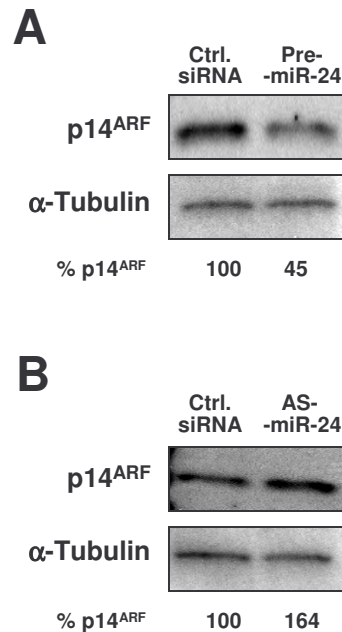

**Supplemental Figure S6. Levels of p14<sup>ARF</sup> after modulating miR-24 levels. (A)** Effect of overexpressing miR-24 on p14<sup>ARF</sup> expression in HeLa cells. Cells were transfected with either Ctrl. siRNA or Pre-miR-24 or (100 nM each) as described in Fig. 2. Forty-eight hr later, lysates were prepared in order to assess the levels of p14<sup>ARF</sup> and loading control α-Tubulin by Western blot analysis and quantify the signals by densitometry. Data are representative of two independent experiments. **(B)** Effect of reducing miR-24 levels on p14<sup>ARF</sup> expression in HeLa cells. Cells were transfected with either Ctrl. siRNA or Pre-miR-24 or (100 nM each) as described in Fig. 3. Forty-eight hr later, lysates were prepared and the levels of p14<sup>ARF</sup> and loading control α-Tubulin were assessed by Western blot analysis and quantified. Data are representative of two independent experiments. The anti-p14<sup>ARF</sup> antibody was from Santa Cruz Biotech.
