# Supplementary material for: p16INK4a Translation Suppressed by miR-24
Source: PLOS journal article supplement (doi:10.1371/journal.pone.0001864), 2008-03-25
Supplement: S7 (10.1371/journal.pone.0001864.s007) [file journal.pone.0001864.s007]

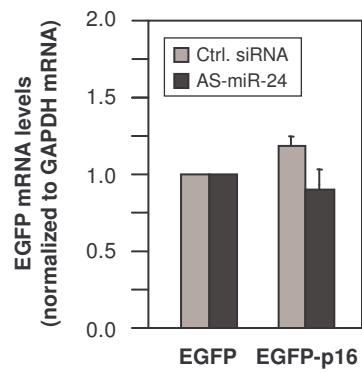

**Supplemental Figure S7. Reporter EGFP mRNA levels.** By 16 hr after transfection of HeLa Tet-off cells with either Ctrl. siRNA or AS-miR-24, along with plasmids pEGFP-p16 or pEGFP (described in Fig. 3E and in the Experimental Procedures section), EGFP and EGFP-p16 mRNA levels were measured by RT-qPCR analysis. Data are the means +SD from 3 independent experiments.
